# Supplementary material for: Reference Values of the QOLIBRI from General Population Samples in the United Kingdom and The Netherlands
Source: MDPI journal article supplement (doi:10.3390/jcm9072100), 2020-07-03
Supplement: s1 [file s1]

| Sex x Health status x Age       |                                |                   |      | Low HRQoL |    | -1 SD |     | Md  |     | +1 SD |     | High HRQoL |     |        |
|---------------------------------|--------------------------------|-------------------|------|-----------|----|-------|-----|-----|-----|-------|-----|------------|-----|--------|
| Sex                             | Health status                  | Age               | N    | 2.5%      | 5% | 16%   | 30% | 40% | 50% | 60%   | 70% | 85%        | 95% | 97.25% |
| Female                          | Healthy                        | Age: 18-40        | 338  | 47        | 50 | 68    | 75  | 75  | 83  | 86    | 90  | 100        | 100 | 100    |
|                                 |                                | Age: 41-64        | 292  | 58        | 63 | 75    | 75  | 83  | 86  | 93    | 97  | 100        | 100 | 100    |
|                                 |                                | Age: 65-75        | 66   | 66        | 72 | 75    | 75  | 83  | 86  | 90    | 97  | 100        | 100 | 100    |
|                                 | At least one chronic condition | Age: 18-40        | 364  | 29        | 36 | 50    | 61  | 68  | 74  | 75    | 83  | 90         | 100 | 100    |
|                                 |                                | Age: 41-64        | 527  | 36        | 50 | 61    | 72  | 75  | 79  | 83    | 90  | 97         | 100 | 100    |
|                                 |                                | Age: 65-75        | 147  | 39        | 54 | 68    | 75  | 79  | 83  | 90    | 93  | 100        | 100 | 100    |
| Male                            | Healthy                        | Age: 18-40        | 388  | 43        | 50 | 61    | 75  | 75  | 83  | 86    | 93  | 100        | 100 | 100    |
|                                 |                                | Age: 41-64        | 396  | 50        | 58 | 75    | 75  | 83  | 90  | 97    | 97  | 100        | 100 | 100    |
|                                 |                                | Age: 65-75        | 92   | 73        | 75 | 75    | 79  | 90  | 93  | 97    | 100 | 100        | 100 | 100    |
|                                 | At least one chronic condition | Age: 18-40        | 248  | 25        | 30 | 47    | 54  | 58  | 63  | 72    | 75  | 86         | 100 | 100    |
|                                 |                                | Age: 41-64        | 436  | 29        | 40 | 58    | 72  | 75  | 75  | 83    | 90  | 97         | 100 | 100    |
|                                 |                                | Age: 65-75        | 105  | 37        | 51 | 72    | 75  | 79  | 90  | 93    | 97  | 100        | 100 | 100    |
| Sex x Health status x Education |                                |                   |      | Low HRQoL |    | -1 SD |     | Md  |     | +1 SD |     | High HRQoL |     |        |
| Sex                             | Health status                  | Education         | N    | 2.5%      | 5% | 16%   | 30% | 40% | 50% | 60%   | 70% | 85%        | 95% | 97.25% |
| Female                          | Healthy                        | education: low    | 171  | 48        | 52 | 65    | 75  | 75  | 79  | 86    | 93  | 100        | 100 | 100    |
|                                 |                                | education: middle | 341  | 50        | 61 | 72    | 75  | 79  | 86  | 90    | 93  | 100        | 100 | 100    |
|                                 |                                | education: high   | 184  | 55        | 62 | 75    | 79  | 83  | 86  | 93    | 97  | 100        | 100 | 100    |
|                                 | At least one chronic condition | education: low    | 374  | 33        | 40 | 54    | 68  | 72  | 75  | 79    | 86  | 97         | 100 | 100    |
|                                 |                                | education: middle | 477  | 29        | 40 | 58    | 72  | 75  | 75  | 83    | 86  | 97         | 100 | 100    |
|                                 |                                | education: high   | 187  | 39        | 50 | 61    | 72  | 75  | 83  | 86    | 90  | 100        | 100 | 100    |
| Male                            | Healthy                        | education: low    | 202  | 43        | 50 | 62    | 75  | 75  | 79  | 86    | 96  | 100        | 100 | 100    |
|                                 |                                | education: middle | 394  | 50        | 54 | 72    | 75  | 79  | 86  | 93    | 97  | 100        | 100 | 100    |
|                                 |                                | education: high   | 280  | 50        | 54 | 75    | 79  | 83  | 90  | 93    | 97  | 100        | 100 | 100    |
|                                 | At least one chronic condition | education: low    | 277  | 25        | 33 | 50    | 68  | 72  | 75  | 75    | 83  | 93         | 100 | 100    |
|                                 |                                | education: middle | 314  | 25        | 36 | 54    | 65  | 72  | 75  | 83    | 86  | 97         | 100 | 100    |
|                                 |                                | education: high   | 198  | 36        | 40 | 54    | 65  | 72  | 75  | 79    | 89  | 99         | 100 | 100    |
|                                 |                                | Total             | 3399 | 36        | 47 | 61    | 72  | 75  | 79  | 86    | 90  | 100        | 100 | 100    |

Note. HRQoL: health-related quality of life; 50% percentiles represent 50% of the distribution corresponding to the median (Md); SD: standard deviation; values from -1 standard deviation (16%) to +1 standard deviation (85%) are within the normal range (i.e., not impaired HRQoL); values below 16% indicate impaired HRQoL and values above 85% indicate outstanding HRQoL.

| Sex x Health status x Age       |                                |                   | Low HRQoL |      |    | -1 SD |     |     | Md  |     |     | +1 SD |     |        | High HRQoL |
|---------------------------------|--------------------------------|-------------------|-----------|------|----|-------|-----|-----|-----|-----|-----|-------|-----|--------|------------|
| Sex                             | Health status                  | Age               | N         | 2.5% | 5% | 16%   | 30% | 40% | 50% | 60% | 70% | 85%   | 95% | 97.25% |            |
| Female                          | Healthy                        | Age: 18-40        | 338       | 20   | 40 | 54    | 65  | 72  | 75  | 75  | 83  | 90    | 97  | 100    |            |
|                                 |                                | Age: 41-64        | 292       | 33   | 42 | 61    | 72  | 75  | 75  | 79  | 83  | 97    | 100 | 100    |            |
|                                 |                                | Age: 65-75        | 66        | 58   | 62 | 68    | 74  | 75  | 75  | 83  | 86  | 94    | 100 | 100    |            |
|                                 | At least one chronic condition | Age: 18-40        | 364       | 8    | 15 | 33    | 47  | 50  | 58  | 65  | 68  | 75    | 86  | 100    |            |
|                                 |                                | Age: 41-64        | 527       | 18   | 25 | 43    | 54  | 61  | 68  | 72  | 75  | 86    | 93  | 97     |            |
|                                 |                                | Age: 65-75        | 147       | 36   | 44 | 58    | 68  | 72  | 72  | 78  | 79  | 86    | 96  | 98     |            |
| Male                            | Healthy                        | Age: 18-40        | 388       | 39   | 47 | 54    | 68  | 72  | 75  | 79  | 83  | 97    | 100 | 100    |            |
|                                 |                                | Age: 41-64        | 396       | 43   | 50 | 65    | 75  | 75  | 79  | 86  | 90  | 97    | 100 | 100    |            |
|                                 |                                | Age: 65-75        | 92        | 62   | 68 | 75    | 75  | 77  | 81  | 86  | 90  | 98    | 100 | 100    |            |
|                                 | At least one chronic condition | Age: 18-40        | 248       | 11   | 22 | 43    | 50  | 54  | 58  | 65  | 68  | 75    | 89  | 93     |            |
|                                 |                                | Age: 41-64        | 436       | 15   | 25 | 43    | 54  | 61  | 68  | 72  | 75  | 83    | 94  | 100    |            |
|                                 |                                | Age: 65-75        | 105       | 40   | 48 | 61    | 69  | 74  | 75  | 79  | 83  | 90    | 97  | 98     |            |
| Sex x Health status x Education |                                |                   | Low HRQoL |      |    | -1 SD |     |     | Md  |     |     | +1 SD |     |        | High HRQoL |
| Sex                             | Health status                  | Education         | N         | 2.5% | 5% | 16%   | 30% | 40% | 50% | 60% | 70% | 85%   | 95% | 97.25% |            |
| Female                          | Healthy                        | education: low    | 171       | 16   | 33 | 54    | 68  | 75  | 75  | 75  | 79  | 90    | 100 | 100    |            |
|                                 |                                | education: middle | 341       | 40   | 47 | 61    | 68  | 72  | 75  | 79  | 86  | 93    | 100 | 100    |            |
|                                 |                                | education: high   | 184       | 35   | 47 | 61    | 68  | 75  | 75  | 79  | 83  | 92    | 97  | 100    |            |
|                                 | At least one chronic condition | education: low    | 374       | 11   | 22 | 40    | 50  | 61  | 68  | 72  | 75  | 83    | 93  | 97     |            |
|                                 |                                | education: middle | 477       | 11   | 22 | 40    | 50  | 61  | 65  | 68  | 75  | 83    | 93  | 97     |            |
|                                 |                                | education: high   | 187       | 25   | 27 | 43    | 54  | 58  | 68  | 72  | 75  | 83    | 93  | 100    |            |
| Male                            | Healthy                        | education: low    | 202       | 43   | 50 | 61    | 72  | 75  | 75  | 83  | 89  | 97    | 100 | 100    |            |
|                                 |                                | education: middle | 394       | 43   | 50 | 61    | 72  | 75  | 79  | 83  | 86  | 97    | 100 | 100    |            |
|                                 |                                | education: high   | 280       | 40   | 47 | 65    | 72  | 75  | 79  | 83  | 90  | 97    | 100 | 100    |            |
|                                 | At least one chronic condition | education: low    | 277       | 11   | 22 | 43    | 54  | 61  | 68  | 72  | 75  | 83    | 93  | 97     |            |
|                                 |                                | education: middle | 314       | 18   | 25 | 43    | 50  | 58  | 65  | 68  | 75  | 83    | 95  | 100    |            |
|                                 |                                | education: high   | 198       | 22   | 33 | 47    | 54  | 61  | 68  | 72  | 75  | 86    | 93  | 100    |            |
| Total                           |                                |                   | 3399      | 22   | 29 | 50    | 61  | 68  | 72  | 75  | 79  | 90    | 100 | 100    |            |

Note. HRQoL: health-related quality of life; 50% percentiles represent 50% of the distribution corresponding to the median (Md); SD: standard deviation; values from -1 standard deviation (16%) to +1 standard deviation (85%) are within the normal range (i.e., not impaired HRQoL); values below 16% indicate impaired HRQoL and values above 85% indicate outstanding HRQoL.

| Sex x Health status x Age       |                                |                   | Low HRQoL |      |    | -1 SD |     | Md  |     |     | +1 SD |     | High HRQoL |        |
|---------------------------------|--------------------------------|-------------------|-----------|------|----|-------|-----|-----|-----|-----|-------|-----|------------|--------|
| Sex                             | Health status                  | Age               | N         | 2.5% | 5% | 16%   | 30% | 40% | 50% | 60% | 70%   | 85% | 95%        | 97.25% |
| Female                          | Healthy                        | Age: 18-40        | 338       | 50   | 50 | 65    | 75  | 75  | 83  | 90  | 93    | 100 | 100        | 100    |
|                                 |                                | Age: 41-64        | 292       | 50   | 58 | 75    | 75  | 83  | 86  | 93  | 97    | 100 | 100        | 100    |
|                                 |                                | Age: 65-75        | 66        | 67   | 68 | 75    | 79  | 86  | 91  | 97  | 97    | 100 | 100        | 100    |
|                                 | At least one chronic condition | Age: 18-40        | 364       | 18   | 29 | 47    | 58  | 65  | 72  | 75  | 79    | 90  | 97         | 100    |
|                                 |                                | Age: 41-64        | 527       | 29   | 36 | 50    | 65  | 68  | 75  | 79  | 83    | 93  | 100        | 100    |
|                                 |                                | Age: 65-75        | 147       | 46   | 50 | 61    | 72  | 75  | 83  | 86  | 90    | 97  | 100        | 100    |
| Male                            | Healthy                        | Age: 18-40        | 388       | 43   | 50 | 61    | 72  | 75  | 79  | 86  | 90    | 100 | 100        | 100    |
|                                 |                                | Age: 41-64        | 396       | 50   | 57 | 72    | 75  | 83  | 86  | 93  | 97    | 100 | 100        | 100    |
|                                 |                                | Age: 65-75        | 92        | 65   | 70 | 75    | 79  | 86  | 93  | 97  | 100   | 100 | 100        | 100    |
|                                 | At least one chronic condition | Age: 18-40        | 248       | 23   | 29 | 43    | 54  | 58  | 63  | 68  | 75    | 83  | 97         | 100    |
|                                 |                                | Age: 41-64        | 436       | 18   | 29 | 50    | 59  | 68  | 72  | 75  | 79    | 92  | 100        | 100    |
|                                 |                                | Age: 65-75        | 105       | 33   | 50 | 60    | 68  | 75  | 79  | 86  | 90    | 97  | 100        | 100    |
| Sex x Health status x Education |                                |                   | Low HRQoL |      |    | -1 SD |     | Md  |     |     | +1 SD |     | High HRQoL |        |
| Sex                             | Health status                  | Education         | N         | 2.5% | 5% | 16%   | 30% | 40% | 50% | 60% | 70%   | 85% | 95%        | 97.25% |
| Female                          | Healthy                        | education: low    | 171       | 48   | 50 | 65    | 75  | 75  | 79  | 86  | 93    | 97  | 100        | 100    |
|                                 |                                | education: middle | 341       | 50   | 54 | 72    | 75  | 79  | 86  | 90  | 97    | 100 | 100        | 100    |
|                                 |                                | education: high   | 184       | 54   | 62 | 72    | 75  | 83  | 90  | 93  | 97    | 100 | 100        | 100    |
|                                 | At least one chronic condition | education: low    | 374       | 25   | 33 | 50    | 61  | 68  | 72  | 75  | 83    | 90  | 100        | 100    |
|                                 |                                | education: middle | 477       | 29   | 33 | 50    | 61  | 68  | 75  | 78  | 83    | 93  | 100        | 100    |
|                                 |                                | education: high   | 187       | 31   | 40 | 54    | 68  | 72  | 75  | 83  | 86    | 93  | 100        | 100    |
| Male                            | Healthy                        | education: low    | 202       | 47   | 50 | 65    | 75  | 75  | 79  | 86  | 93    | 100 | 100        | 100    |
|                                 |                                | education: middle | 394       | 50   | 50 | 68    | 75  | 79  | 83  | 90  | 97    | 100 | 100        | 100    |
|                                 |                                | education: high   | 280       | 43   | 50 | 68    | 75  | 83  | 90  | 93  | 97    | 100 | 100        | 100    |
|                                 | At least one chronic condition | education: low    | 277       | 18   | 25 | 47    | 54  | 61  | 68  | 72  | 75    | 90  | 97         | 100    |
|                                 |                                | education: middle | 314       | 25   | 33 | 50    | 58  | 65  | 72  | 75  | 83    | 93  | 100        | 100    |
|                                 |                                | education: high   | 198       | 32   | 39 | 52    | 61  | 71  | 75  | 76  | 83    | 93  | 100        | 100    |
|                                 |                                | Total             | 3399      | 29   | 40 | 54    | 68  | 75  | 75  | 83  | 90    | 97  | 100        | 100    |

Note. HRQoL: health-related quality of life; 50% percentiles represent 50% of the distribution corresponding to the median (Md); SD: standard deviation; values from -1 standard deviation (16%) to +1 standard deviation (85%) are within the normal range (i.e., not impaired HRQoL); values below 16% indicate impaired HRQoL and values above 85% indicate outstanding HRQoL.

| Sex x Health status x Age       |                                |                   | Low HRQoL |      |    | -1 SD |     |     | Md  |     |     | +1 SD |     |        | High HRQoL |
|---------------------------------|--------------------------------|-------------------|-----------|------|----|-------|-----|-----|-----|-----|-----|-------|-----|--------|------------|
| Sex                             | Health status                  | Age               | N         | 2.5% | 5% | 16%   | 30% | 40% | 50% | 60% | 70% | 85%   | 95% | 97.25% |            |
| Female                          | Healthy                        | Age: 18-40        | 338       | 42   | 50 | 63    | 75  | 75  | 80  | 88  | 92  | 100   | 100 | 100    |            |
|                                 |                                | Age: 41-64        | 292       | 42   | 49 | 67    | 75  | 75  | 82  | 88  | 96  | 100   | 100 | 100    |            |
|                                 |                                | Age: 65-75        | 66        | 46   | 53 | 71    | 75  | 80  | 84  | 92  | 94  | 97    | 100 | 100    |            |
|                                 | At least one chronic condition | Age: 18-40        | 364       | 25   | 34 | 50    | 59  | 67  | 71  | 75  | 80  | 92    | 100 | 100    |            |
|                                 |                                | Age: 41-64        | 527       | 30   | 38 | 50    | 67  | 71  | 75  | 80  | 88  | 92    | 100 | 100    |            |
|                                 |                                | Age: 65-75        | 147       | 49   | 52 | 63    | 71  | 73  | 75  | 80  | 84  | 92    | 100 | 100    |            |
| Male                            | Healthy                        | Age: 18-40        | 388       | 32   | 44 | 58    | 67  | 75  | 75  | 84  | 88  | 100   | 100 | 100    |            |
|                                 |                                | Age: 41-64        | 396       | 42   | 50 | 63    | 73  | 75  | 80  | 84  | 92  | 96    | 100 | 100    |            |
|                                 |                                | Age: 65-75        | 92        | 55   | 59 | 71    | 75  | 75  | 80  | 88  | 92  | 100   | 100 | 100    |            |
|                                 | At least one chronic condition | Age: 18-40        | 248       | 19   | 30 | 42    | 50  | 55  | 63  | 71  | 75  | 84    | 96  | 100    |            |
|                                 |                                | Age: 41-64        | 436       | 13   | 21 | 46    | 59  | 63  | 71  | 75  | 80  | 88    | 100 | 100    |            |
|                                 |                                | Age: 65-75        | 105       | 41   | 46 | 59    | 67  | 75  | 80  | 84  | 88  | 96    | 96  | 98     |            |
| Sex x Health status x Education |                                |                   | Low HRQoL |      |    | -1 SD |     |     | Md  |     |     | +1 SD |     |        | High HRQoL |
| Sex                             | Health status                  | Education         | N         | 2.5% | 5% | 16%   | 30% | 40% | 50% | 60% | 70% | 85%   | 95% | 97.25% |            |
| Female                          | Healthy                        | education: low    | 171       | 38   | 42 | 59    | 75  | 75  | 80  | 84  | 92  | 100   | 100 | 100    |            |
|                                 |                                | education: middle | 341       | 46   | 50 | 67    | 75  | 80  | 84  | 88  | 92  | 100   | 100 | 100    |            |
|                                 |                                | education: high   | 184       | 46   | 50 | 67    | 75  | 75  | 82  | 88  | 92  | 100   | 100 | 100    |            |
|                                 | At least one chronic condition | education: low    | 374       | 30   | 37 | 55    | 67  | 71  | 75  | 80  | 84  | 92    | 100 | 100    |            |
|                                 |                                | education: middle | 477       | 30   | 38 | 50    | 63  | 71  | 75  | 80  | 84  | 92    | 100 | 100    |            |
|                                 |                                | education: high   | 187       | 25   | 35 | 55    | 67  | 71  | 75  | 80  | 84  | 92    | 100 | 100    |            |
| Male                            | Healthy                        | education: low    | 202       | 38   | 42 | 55    | 67  | 75  | 75  | 82  | 88  | 96    | 100 | 100    |            |
|                                 |                                | education: middle | 394       | 38   | 49 | 63    | 71  | 75  | 80  | 84  | 92  | 100   | 100 | 100    |            |
|                                 |                                | education: high   | 280       | 38   | 50 | 59    | 75  | 75  | 80  | 84  | 92  | 100   | 100 | 100    |            |
|                                 | At least one chronic condition | education: low    | 277       | 17   | 21 | 46    | 55  | 63  | 67  | 75  | 80  | 88    | 96  | 100    |            |
|                                 |                                | education: middle | 314       | 13   | 25 | 46    | 55  | 63  | 71  | 75  | 80  | 88    | 100 | 100    |            |
|                                 |                                | education: high   | 198       | 25   | 33 | 50    | 59  | 66  | 71  | 75  | 80  | 88    | 97  | 100    |            |
|                                 |                                | Total             | 3399      | 30   | 38 | 55    | 67  | 75  | 75  | 80  | 88  | 96    | 100 | 100    |            |

Note. HRQoL: health-related quality of life; 50% percentiles represent 50% of the distribution corresponding to the median (Md); SD: standard deviation; values from -1 standard deviation (16%) to +1 standard deviation (85%) are within the normal range (i.e., not impaired HRQoL); values below 16% indicate impaired HRQoL and values above 85% indicate outstanding HRQoL.

## Reference values for the QOLIBRI Emotions scale (NL)

| Sex x Health status x Age       |                                |                   |      | Low HRQoL |    | -1 SD |     | Md  |     |     | +1 SD |     | High HRQoL |        |
|---------------------------------|--------------------------------|-------------------|------|-----------|----|-------|-----|-----|-----|-----|-------|-----|------------|--------|
| Sex                             | Health status                  | Age               | N    | 2.5%      | 5% | 16%   | 30% | 40% | 50% | 60% | 70%   | 85% | 95%        | 97.25% |
| Female                          | Healthy                        | Age: 18-40        | 338  | 25        | 25 | 45    | 56  | 65  | 73  | 80  | 86    | 95  | 100        | 100    |
|                                 |                                | Age: 41-64        | 292  | 25        | 35 | 50    | 65  | 75  | 80  | 86  | 95    | 100 | 100        | 100    |
|                                 |                                | Age: 65-75        | 66   | 24        | 47 | 62    | 75  | 86  | 90  | 90  | 100   | 100 | 100        | 100    |
|                                 | At least one chronic condition | Age: 18-40        | 364  | 16        | 20 | 35    | 45  | 50  | 56  | 60  | 70    | 80  | 90         | 100    |
|                                 |                                | Age: 41-64        | 527  | 20        | 25 | 45    | 56  | 65  | 75  | 80  | 86    | 95  | 100        | 100    |
|                                 |                                | Age: 65-75        | 147  | 29        | 35 | 56    | 65  | 73  | 75  | 83  | 90    | 95  | 100        | 100    |
| Male                            | Healthy                        | Age: 18-40        | 388  | 16        | 25 | 40    | 56  | 60  | 70  | 75  | 86    | 95  | 100        | 100    |
|                                 |                                | Age: 41-64        | 396  | 25        | 34 | 50    | 70  | 75  | 86  | 90  | 95    | 100 | 100        | 100    |
|                                 |                                | Age: 65-75        | 92   | 47        | 56 | 75    | 80  | 86  | 90  | 95  | 100   | 100 | 100        | 100    |
|                                 | At least one chronic condition | Age: 18-40        | 248  | 16        | 20 | 31    | 40  | 45  | 50  | 50  | 60    | 75  | 90         | 100    |
|                                 |                                | Age: 41-64        | 436  | 25        | 31 | 40    | 50  | 60  | 65  | 75  | 80    | 95  | 100        | 100    |
|                                 |                                | Age: 65-75        | 105  | 40        | 40 | 56    | 75  | 75  | 86  | 90  | 90    | 100 | 100        | 100    |
| Sex x Health status x Education |                                |                   |      | Low HRQoL |    | -1 SD |     | Md  |     |     | +1 SD |     | High HRQoL |        |
| Sex                             | Health status                  | Education         | N    | 2.5%      | 5% | 16%   | 30% | 40% | 50% | 60% | 70%   | 85% | 95%        | 97.25% |
| Female                          | Healthy                        | education: low    | 171  | 25        | 31 | 50    | 60  | 70  | 75  | 86  | 95    | 100 | 100        | 100    |
|                                 |                                | education: middle | 341  | 25        | 25 | 50    | 60  | 70  | 75  | 86  | 90    | 100 | 100        | 100    |
|                                 |                                | education: high   | 184  | 25        | 35 | 50    | 60  | 70  | 80  | 84  | 90    | 100 | 100        | 100    |
|                                 | At least one chronic condition | education: low    | 374  | 16        | 25 | 40    | 50  | 60  | 70  | 75  | 86    | 95  | 100        | 100    |
|                                 |                                | education: middle | 477  | 20        | 25 | 40    | 56  | 60  | 65  | 75  | 80    | 90  | 100        | 100    |
|                                 |                                | education: high   | 187  | 25        | 25 | 40    | 56  | 60  | 65  | 75  | 80    | 90  | 100        | 100    |
| Male                            | Healthy                        | education: low    | 202  | 25        | 25 | 45    | 56  | 70  | 75  | 86  | 90    | 100 | 100        | 100    |
|                                 |                                | education: middle | 394  | 25        | 31 | 50    | 65  | 75  | 80  | 90  | 95    | 100 | 100        | 100    |
|                                 |                                | education: high   | 280  | 20        | 31 | 50    | 60  | 75  | 80  | 86  | 92    | 100 | 100        | 100    |
|                                 | At least one chronic condition | education: low    | 277  | 20        | 25 | 40    | 50  | 56  | 65  | 73  | 80    | 90  | 100        | 100    |
|                                 |                                | education: middle | 314  | 20        | 25 | 35    | 45  | 50  | 60  | 65  | 76    | 90  | 100        | 100    |
|                                 |                                | education: high   | 198  | 16        | 20 | 33    | 45  | 50  | 56  | 65  | 80    | 90  | 100        | 100    |
|                                 |                                | Total             | 3399 | 20        | 25 | 40    | 56  | 65  | 70  | 80  | 86    | 100 | 100        | 100    |

Note. HRQoL: health-related quality of life; 50% percentiles represent 50% of the distribution corresponding to the median (Md); SD: standard deviation; values from -1 standard deviation (16%) to +1 standard deviation (85%) are within the normal range (i.e., not impaired HRQoL); values below 16% indicate impaired HRQoL and values above 85% indicate outstanding HRQoL.

| Sex x Health status x Age       |                                |                   | Low HRQoL |      |    | -1 SD |     |     | Md  |     |     | +1 SD |     |        | High HRQoL |
|---------------------------------|--------------------------------|-------------------|-----------|------|----|-------|-----|-----|-----|-----|-----|-------|-----|--------|------------|
| Sex                             | Health status                  | Age               | N         | 2.5% | 5% | 16%   | 30% | 40% | 50% | 60% | 70% | 85%   | 95% | 97.25% |            |
| Female                          | Healthy                        | Age: 18-40        | 338       | 38   | 45 | 60    | 75  | 80  | 86  | 90  | 95  | 100   | 100 | 100    |            |
|                                 |                                | Age: 41-64        | 292       | 42   | 50 | 65    | 75  | 80  | 86  | 90  | 95  | 100   | 100 | 100    |            |
|                                 |                                | Age: 65-75        | 66        | 40   | 52 | 70    | 80  | 80  | 86  | 86  | 90  | 95    | 100 | 100    |            |
|                                 | At least one chronic condition | Age: 18-40        | 364       | 20   | 25 | 40    | 50  | 56  | 60  | 65  | 75  | 80    | 95  | 100    |            |
|                                 |                                | Age: 41-64        | 527       | 16   | 25 | 35    | 45  | 56  | 60  | 70  | 75  | 86    | 99  | 100    |            |
|                                 |                                | Age: 65-75        | 147       | 16   | 20 | 35    | 50  | 56  | 60  | 70  | 75  | 86    | 94  | 95     |            |
| Male                            | Healthy                        | Age: 18-40        | 388       | 31   | 35 | 50    | 70  | 75  | 86  | 90  | 95  | 100   | 100 | 100    |            |
|                                 |                                | Age: 41-64        | 396       | 40   | 50 | 70    | 80  | 86  | 90  | 95  | 100 | 100   | 100 | 100    |            |
|                                 |                                | Age: 65-75        | 92        | 52   | 65 | 75    | 86  | 86  | 90  | 95  | 100 | 100   | 100 | 100    |            |
|                                 | At least one chronic condition | Age: 18-40        | 248       | 21   | 25 | 35    | 45  | 50  | 56  | 60  | 70  | 80    | 99  | 100    |            |
|                                 |                                | Age: 41-64        | 436       | 16   | 20 | 35    | 45  | 50  | 60  | 65  | 73  | 86    | 100 | 100    |            |
|                                 |                                | Age: 65-75        | 105       | 25   | 31 | 45    | 56  | 60  | 70  | 77  | 80  | 92    | 99  | 100    |            |
| Sex x Health status x Education |                                |                   | Low HRQoL |      |    | -1 SD |     |     | Md  |     |     | +1 SD |     |        | High HRQoL |
| Sex                             | Health status                  | Education         | N         | 2.5% | 5% | 16%   | 30% | 40% | 50% | 60% | 70% | 85%   | 95% | 97.25% |            |
| Female                          | Healthy                        | education: low    | 171       | 45   | 50 | 60    | 75  | 80  | 80  | 86  | 90  | 100   | 100 | 100    |            |
|                                 |                                | education: middle | 341       | 31   | 45 | 65    | 75  | 80  | 86  | 90  | 95  | 100   | 100 | 100    |            |
|                                 |                                | education: high   | 184       | 45   | 50 | 70    | 80  | 86  | 86  | 90  | 95  | 100   | 100 | 100    |            |
|                                 | At least one chronic condition | education: low    | 374       | 16   | 25 | 35    | 45  | 50  | 60  | 70  | 75  | 80    | 95  | 95     |            |
|                                 |                                | education: middle | 477       | 16   | 25 | 35    | 50  | 56  | 60  | 65  | 75  | 86    | 95  | 100    |            |
|                                 |                                | education: high   | 187       | 25   | 31 | 44    | 50  | 56  | 60  | 70  | 75  | 86    | 100 | 100    |            |
| Male                            | Healthy                        | education: low    | 202       | 35   | 45 | 51    | 75  | 80  | 86  | 90  | 95  | 100   | 100 | 100    |            |
|                                 |                                | education: middle | 394       | 31   | 40 | 65    | 75  | 86  | 90  | 95  | 100 | 100   | 100 | 100    |            |
|                                 |                                | education: high   | 280       | 35   | 40 | 70    | 80  | 86  | 90  | 95  | 100 | 100   | 100 | 100    |            |
|                                 | At least one chronic condition | education: low    | 277       | 16   | 20 | 35    | 45  | 50  | 56  | 60  | 70  | 86    | 95  | 100    |            |
|                                 |                                | education: middle | 314       | 20   | 25 | 35    | 45  | 50  | 56  | 65  | 75  | 86    | 100 | 100    |            |
|                                 |                                | education: high   | 198       | 25   | 30 | 35    | 50  | 56  | 60  | 65  | 75  | 90    | 100 | 100    |            |
|                                 |                                | Total             | 3399      | 25   | 31 | 45    | 56  | 65  | 75  | 80  | 86  | 100   | 100 | 100    |            |

Note. HRQoL: health-related quality of life; 50% percentiles represent 50% of the distribution corresponding to the median (Md); SD: standard deviation; values from -1 standard deviation (16%) to +1 standard deviation (85%) are within the normal range (i.e., not impaired HRQoL); values below 16% indicate impaired HRQoL and values above 85% indicate outstanding HRQoL.
