# Supplementary material for: Reference Values of the QOLIBRI from General Population Samples in the United Kingdom and The Netherlands
Source: MDPI journal article supplement (doi:10.3390/jcm9072100), 2020-07-03
Supplement: s1 [file s1]

| Sex x Health status x Age       |                                |                   | Low HRQoL |      |    | -1 SD |     |     | Md  |     |     | +1 SD |     |        | High HRQoL |
|---------------------------------|--------------------------------|-------------------|-----------|------|----|-------|-----|-----|-----|-----|-----|-------|-----|--------|------------|
| Sex                             | Health status                  | Age               | N         | 2.5% | 5% | 16%   | 30% | 40% | 50% | 60% | 70% | 85%   | 95% | 97.25% |            |
| Female                          | Healthy                        | Age: 18-40        | 434       | 32   | 40 | 50    | 68  | 75  | 75  | 83  | 90  | 100   | 100 | 100    |            |
|                                 |                                | Age: 41-64        | 408       | 47   | 50 | 68    | 75  | 83  | 86  | 93  | 97  | 100   | 100 | 100    |            |
|                                 |                                | Age: 65-75        | 119       | 54   | 64 | 75    | 90  | 93  | 97  | 97  | 100 | 100   | 100 | 100    |            |
|                                 | At least one chronic condition | Age: 18-40        | 547       | 15   | 22 | 36    | 47  | 50  | 61  | 68  | 75  | 86    | 100 | 100    |            |
|                                 |                                | Age: 41-64        | 587       | 8    | 15 | 40    | 50  | 58  | 68  | 75  | 83  | 93    | 100 | 100    |            |
|                                 |                                | Age: 65-75        | 174       | 27   | 40 | 57    | 75  | 79  | 86  | 90  | 93  | 100   | 100 | 100    |            |
| Male                            | Healthy                        | Age: 18-40        | 497       | 29   | 36 | 50    | 65  | 72  | 75  | 83  | 86  | 97    | 100 | 100    |            |
|                                 |                                | Age: 41-64        | 442       | 43   | 50 | 70    | 75  | 79  | 86  | 93  | 97  | 100   | 100 | 100    |            |
|                                 |                                | Age: 65-75        | 116       | 43   | 53 | 75    | 83  | 90  | 93  | 97  | 97  | 100   | 100 | 100    |            |
|                                 | At least one chronic condition | Age: 18-40        | 407       | 11   | 22 | 36    | 47  | 50  | 58  | 65  | 72  | 83    | 97  | 100    |            |
|                                 |                                | Age: 41-64        | 517       | 11   | 18 | 43    | 50  | 61  | 72  | 78  | 86  | 97    | 100 | 100    |            |
|                                 |                                | Age: 65-75        | 155       | 28   | 36 | 61    | 72  | 75  | 83  | 90  | 93  | 100   | 100 | 100    |            |
| Sex x Health status x Education |                                |                   | Low HRQoL |      |    | -1 SD |     |     | Md  |     |     | +1 SD |     |        | High HRQoL |
| Sex                             | Health status                  | Education         | N         | 2.5% | 5% | 16%   | 30% | 40% | 50% | 60% | 70% | 85%   | 95% | 97.25% |            |
| Female                          | Healthy                        | education: low    | 193       | 33   | 43 | 50    | 72  | 75  | 86  | 90  | 97  | 100   | 100 | 100    |            |
|                                 |                                | education: middle | 383       | 40   | 50 | 65    | 75  | 79  | 86  | 90  | 97  | 100   | 100 | 100    |            |
|                                 |                                | education: high   | 385       | 40   | 50 | 61    | 75  | 75  | 83  | 90  | 93  | 100   | 100 | 100    |            |
|                                 | At least one chronic condition | education: low    | 332       | 15   | 24 | 36    | 50  | 56  | 68  | 75  | 83  | 97    | 100 | 100    |            |
|                                 |                                | education: middle | 526       | 8    | 18 | 36    | 50  | 58  | 68  | 75  | 79  | 93    | 100 | 100    |            |
|                                 |                                | education: high   | 450       | 15   | 22 | 40    | 50  | 61  | 72  | 75  | 83  | 93    | 100 | 100    |            |
| Male                            | Healthy                        | education: low    | 197       | 25   | 25 | 50    | 72  | 75  | 79  | 86  | 93  | 100   | 100 | 100    |            |
|                                 |                                | education: middle | 493       | 41   | 47 | 58    | 72  | 75  | 79  | 86  | 93  | 100   | 100 | 100    |            |
|                                 |                                | education: high   | 365       | 36   | 43 | 61    | 75  | 79  | 86  | 90  | 93  | 100   | 100 | 100    |            |
|                                 | At least one chronic condition | education: low    | 280       | 11   | 15 | 36    | 47  | 50  | 61  | 72  | 75  | 93    | 100 | 100    |            |
|                                 |                                | education: middle | 482       | 11   | 22 | 40    | 50  | 61  | 68  | 75  | 83  | 97    | 100 | 100    |            |
|                                 |                                | education: high   | 317       | 22   | 29 | 43    | 57  | 65  | 72  | 75  | 83  | 97    | 100 | 100    |            |
|                                 |                                | Total             | 4403      | 18   | 25 | 47    | 61  | 72  | 75  | 83  | 90  | 97    | 100 | 100    |            |

Note. HRQoL: health-related quality of life; 50% percentiles represent 50% of the distribution corresponding to the median (Md); SD: standard deviation; values from -1 standard deviation (16%) to +1 standard deviation (85%) are within the normal range (i.e., not impaired HRQoL); values below 16% indicate impaired HRQoL and values above 85% indicate outstanding HRQoL.

| Sex x Health status x Age       |                                |                   | Low HRQoL |      |    | -1 SD |     |     | Md  |     |     | +1 SD |     |        | High HRQoL |
|---------------------------------|--------------------------------|-------------------|-----------|------|----|-------|-----|-----|-----|-----|-----|-------|-----|--------|------------|
| Sex                             | Health status                  | Age               | N         | 2.5% | 5% | 16%   | 30% | 40% | 50% | 60% | 70% | 85%   | 95% | 97.25% |            |
| Female                          | Healthy                        | Age: 18-40        | 434       | 14   | 21 | 36    | 50  | 54  | 61  | 68  | 75  | 86    | 100 | 100    |            |
|                                 |                                | Age: 41-64        | 408       | 18   | 25 | 43    | 54  | 65  | 72  | 75  | 79  | 93    | 100 | 100    |            |
|                                 |                                | Age: 65-75        | 119       | 36   | 40 | 54    | 63  | 72  | 75  | 79  | 86  | 94    | 100 | 100    |            |
|                                 | At least one chronic condition | Age: 18-40        | 547       | 0    | 0  | 8     | 18  | 25  | 36  | 43  | 50  | 61    | 79  | 91     |            |
|                                 |                                | Age: 41-64        | 587       | 0    | 0  | 11    | 25  | 33  | 43  | 49  | 54  | 72    | 86  | 95     |            |
|                                 |                                | Age: 65-75        | 174       | 11   | 17 | 32    | 47  | 54  | 61  | 65  | 72  | 83    | 95  | 97     |            |
| Male                            | Healthy                        | Age: 18-40        | 497       | 25   | 29 | 43    | 50  | 58  | 65  | 72  | 75  | 86    | 100 | 100    |            |
|                                 |                                | Age: 41-64        | 442       | 22   | 33 | 50    | 61  | 68  | 75  | 75  | 83  | 97    | 100 | 100    |            |
|                                 |                                | Age: 65-75        | 116       | 39   | 50 | 61    | 72  | 75  | 75  | 79  | 86  | 93    | 100 | 100    |            |
|                                 | At least one chronic condition | Age: 18-40        | 407       | 0    | 4  | 15    | 29  | 36  | 43  | 50  | 54  | 68    | 79  | 93     |            |
|                                 |                                | Age: 41-64        | 517       | 0    | 4  | 15    | 33  | 40  | 50  | 54  | 61  | 75    | 93  | 97     |            |
|                                 |                                | Age: 65-75        | 155       | 7    | 24 | 38    | 54  | 61  | 65  | 72  | 75  | 86    | 93  | 98     |            |
| Sex x Health status x Education |                                |                   | Low HRQoL |      |    | -1 SD |     |     | Md  |     |     | +1 SD |     |        | High HRQoL |
| Sex                             | Health status                  | Education         | N         | 2.5% | 5% | 16%   | 30% | 40% | 50% | 60% | 70% | 85%   | 95% | 97.25% |            |
| Female                          | Healthy                        | education: low    | 193       | 18   | 25 | 43    | 50  | 61  | 68  | 75  | 79  | 93    | 100 | 100    |            |
|                                 |                                | education: middle | 383       | 18   | 25 | 43    | 50  | 58  | 68  | 75  | 75  | 92    | 100 | 100    |            |
|                                 |                                | education: high   | 385       | 11   | 25 | 43    | 54  | 61  | 68  | 73  | 79  | 86    | 100 | 100    |            |
|                                 | At least one chronic condition | education: low    | 332       | 0    | 0  | 15    | 25  | 36  | 43  | 50  | 58  | 72    | 93  | 100    |            |
|                                 |                                | education: middle | 526       | 0    | 0  | 15    | 25  | 33  | 40  | 50  | 54  | 69    | 86  | 93     |            |
|                                 |                                | education: high   | 450       | 0    | 0  | 11    | 25  | 36  | 43  | 48  | 58  | 72    | 86  | 93     |            |
| Male                            | Healthy                        | education: low    | 197       | 22   | 33 | 50    | 58  | 68  | 75  | 79  | 86  | 97    | 100 | 100    |            |
|                                 |                                | education: middle | 493       | 25   | 29 | 47    | 54  | 61  | 68  | 75  | 79  | 90    | 100 | 100    |            |
|                                 |                                | education: high   | 365       | 25   | 36 | 50    | 58  | 65  | 72  | 75  | 79  | 90    | 100 | 100    |            |
|                                 | At least one chronic condition | education: low    | 280       | 0    | 4  | 18    | 33  | 40  | 47  | 54  | 61  | 75    | 93  | 97     |            |
|                                 |                                | education: middle | 482       | 0    | 4  | 15    | 29  | 40  | 47  | 50  | 61  | 72    | 90  | 97     |            |
|                                 |                                | education: high   | 317       | 4    | 8  | 25    | 40  | 47  | 50  | 61  | 68  | 75    | 93  | 97     |            |
|                                 |                                | Total             | 4403      | 0    | 8  | 25    | 43  | 50  | 54  | 65  | 72  | 83    | 100 | 100    |            |

Note. HRQoL: health-related quality of life; 50% percentiles represent 50% of the distribution corresponding to the median (Md); SD: standard deviation; values from -1 standard deviation (16%) to +1 standard deviation (85%) are within the normal range (i.e., not impaired HRQoL); values below 16% indicate impaired HRQoL and values above 85% indicate outstanding HRQoL.

| Sex x Health status x Age       |                                |                   | Low HRQoL |      |    | -1 SD |     |     | Md  |     |     | +1 SD |     |        | High HRQoL |
|---------------------------------|--------------------------------|-------------------|-----------|------|----|-------|-----|-----|-----|-----|-----|-------|-----|--------|------------|
| Sex                             | Health status                  | Age               | N         | 2.5% | 5% | 16%   | 30% | 40% | 50% | 60% | 70% | 85%   | 95% | 97.25% |            |
| Female                          | Healthy                        | Age: 18-40        | 434       | 33   | 40 | 54    | 68  | 72  | 75  | 82  | 87  | 97    | 100 | 100    |            |
|                                 |                                | Age: 41-64        | 408       | 44   | 50 | 65    | 75  | 83  | 86  | 93  | 97  | 100   | 100 | 100    |            |
|                                 |                                | Age: 65-75        | 119       | 50   | 54 | 75    | 83  | 86  | 90  | 97  | 97  | 100   | 100 | 100    |            |
|                                 | At least one chronic condition | Age: 18-40        | 547       | 4    | 8  | 25    | 40  | 47  | 50  | 61  | 68  | 83    | 93  | 100    |            |
|                                 |                                | Age: 41-64        | 587       | 4    | 8  | 25    | 40  | 50  | 58  | 68  | 75  | 86    | 99  | 100    |            |
|                                 |                                | Age: 65-75        | 174       | 16   | 25 | 46    | 58  | 65  | 72  | 79  | 86  | 93    | 100 | 100    |            |
| Male                            | Healthy                        | Age: 18-40        | 497       | 36   | 40 | 50    | 61  | 68  | 75  | 79  | 86  | 93    | 100 | 100    |            |
|                                 |                                | Age: 41-64        | 442       | 47   | 50 | 65    | 75  | 79  | 86  | 90  | 97  | 100   | 100 | 100    |            |
|                                 |                                | Age: 65-75        | 116       | 54   | 65 | 75    | 83  | 86  | 90  | 93  | 97  | 100   | 100 | 100    |            |
|                                 | At least one chronic condition | Age: 18-40        | 407       | 8    | 11 | 29    | 40  | 47  | 50  | 58  | 65  | 75    | 90  | 93     |            |
|                                 |                                | Age: 41-64        | 517       | 0    | 8  | 29    | 43  | 50  | 58  | 68  | 75  | 92    | 100 | 100    |            |
|                                 |                                | Age: 65-75        | 155       | 19   | 28 | 50    | 58  | 68  | 75  | 83  | 86  | 97    | 100 | 100    |            |
| Sex x Health status x Education |                                |                   | Low HRQoL |      |    | -1 SD |     |     | Md  |     |     | +1 SD |     |        | High HRQoL |
| Sex                             | Health status                  | Education         | N         | 2.5% | 5% | 16%   | 30% | 40% | 50% | 60% | 70% | 85%   | 95% | 97.25% |            |
| Female                          | Healthy                        | education: low    | 193       | 36   | 47 | 54    | 70  | 75  | 83  | 86  | 93  | 100   | 100 | 100    |            |
|                                 |                                | education: middle | 383       | 43   | 50 | 61    | 72  | 75  | 83  | 90  | 93  | 100   | 100 | 100    |            |
|                                 |                                | education: high   | 385       | 40   | 44 | 61    | 72  | 75  | 83  | 86  | 93  | 100   | 100 | 100    |            |
|                                 | At least one chronic condition | education: low    | 332       | 8    | 15 | 25    | 36  | 47  | 50  | 61  | 68  | 83    | 99  | 100    |            |
|                                 |                                | education: middle | 526       | 0    | 8  | 25    | 43  | 50  | 58  | 65  | 72  | 86    | 97  | 100    |            |
|                                 |                                | education: high   | 450       | 4    | 9  | 32    | 47  | 53  | 63  | 72  | 75  | 90    | 100 | 100    |            |
| Male                            | Healthy                        | education: low    | 197       | 36   | 46 | 52    | 68  | 75  | 79  | 86  | 90  | 100   | 100 | 100    |            |
|                                 |                                | education: middle | 493       | 40   | 45 | 54    | 68  | 75  | 79  | 86  | 90  | 100   | 100 | 100    |            |
|                                 |                                | education: high   | 365       | 43   | 48 | 61    | 75  | 79  | 83  | 90  | 93  | 100   | 100 | 100    |            |
|                                 | At least one chronic condition | education: low    | 280       | 0    | 8  | 25    | 40  | 47  | 50  | 58  | 68  | 86    | 100 | 100    |            |
|                                 |                                | education: middle | 482       | 4    | 11 | 29    | 43  | 50  | 58  | 65  | 75  | 90    | 100 | 100    |            |
|                                 |                                | education: high   | 317       | 11   | 18 | 40    | 50  | 56  | 61  | 68  | 75  | 90    | 100 | 100    |            |
|                                 |                                | Total             | 4403      | 8    | 18 | 40    | 54  | 61  | 72  | 75  | 86  | 97    | 100 | 100    |            |

Note. HRQoL: health-related quality of life; 50% percentiles represent 50% of the distribution corresponding to the median (Md); SD: standard deviation; values from -1 standard deviation (16%) to +1 standard deviation (85%) are within the normal range (i.e., not impaired HRQoL); values below 16% indicate impaired HRQoL and values above 85% indicate outstanding HRQoL.

| Sex x Health status x Age       |                                |                   | Low HRQoL |      |    | -1 SD |     |     | Md  |     |     | +1 SD |     |        | High HRQoL |
|---------------------------------|--------------------------------|-------------------|-----------|------|----|-------|-----|-----|-----|-----|-----|-------|-----|--------|------------|
| Sex                             | Health status                  | Age               | N         | 2.5% | 5% | 16%   | 30% | 40% | 50% | 60% | 70% | 85%   | 95% | 97.25% |            |
| Female                          | Healthy                        | Age: 18-40        | 434       | 25   | 34 | 50    | 63  | 71  | 75  | 75  | 84  | 96    | 100 | 100    |            |
|                                 |                                | Age: 41-64        | 408       | 34   | 39 | 50    | 67  | 75  | 80  | 88  | 92  | 100   | 100 | 100    |            |
|                                 |                                | Age: 65-75        | 119       | 42   | 50 | 58    | 71  | 75  | 88  | 92  | 96  | 100   | 100 | 100    |            |
|                                 | At least one chronic condition | Age: 18-40        | 547       | 0    | 9  | 25    | 38  | 46  | 50  | 59  | 67  | 80    | 92  | 100    |            |
|                                 |                                | Age: 41-64        | 587       | 5    | 13 | 30    | 46  | 50  | 59  | 67  | 75  | 88    | 100 | 100    |            |
|                                 |                                | Age: 65-75        | 174       | 25   | 32 | 46    | 63  | 67  | 75  | 83  | 88  | 96    | 100 | 100    |            |
| Male                            | Healthy                        | Age: 18-40        | 497       | 25   | 30 | 46    | 50  | 59  | 67  | 71  | 75  | 92    | 100 | 100    |            |
|                                 |                                | Age: 41-64        | 442       | 25   | 34 | 50    | 63  | 71  | 75  | 84  | 88  | 100   | 100 | 100    |            |
|                                 |                                | Age: 65-75        | 116       | 49   | 54 | 67    | 75  | 75  | 80  | 88  | 92  | 99    | 100 | 100    |            |
|                                 | At least one chronic condition | Age: 18-40        | 407       | 0    | 9  | 25    | 38  | 46  | 50  | 55  | 63  | 75    | 92  | 100    |            |
|                                 |                                | Age: 41-64        | 517       | 0    | 9  | 30    | 42  | 50  | 59  | 67  | 75  | 88    | 100 | 100    |            |
|                                 |                                | Age: 65-75        | 155       | 17   | 28 | 49    | 59  | 67  | 75  | 80  | 84  | 96    | 100 | 100    |            |
| Sex x Health status x Education |                                |                   | Low HRQoL |      |    | -1 SD |     |     | Md  |     |     | +1 SD |     |        | High HRQoL |
| Sex                             | Health status                  | Education         | N         | 2.5% | 5% | 16%   | 30% | 40% | 50% | 60% | 70% | 85%   | 95% | 97.25% |            |
| Female                          | Healthy                        | education: low    | 193       | 30   | 38 | 50    | 63  | 71  | 75  | 84  | 92  | 100   | 100 | 100    |            |
|                                 |                                | education: middle | 383       | 25   | 38 | 50    | 63  | 71  | 75  | 84  | 92  | 100   | 100 | 100    |            |
|                                 |                                | education: high   | 385       | 30   | 42 | 55    | 67  | 71  | 75  | 80  | 91  | 100   | 100 | 100    |            |
|                                 | At least one chronic condition | education: low    | 332       | 10   | 17 | 30    | 46  | 55  | 59  | 67  | 75  | 92    | 100 | 100    |            |
|                                 |                                | education: middle | 526       | 0    | 9  | 25    | 42  | 50  | 55  | 67  | 75  | 88    | 100 | 100    |            |
|                                 |                                | education: high   | 450       | 5    | 13 | 30    | 42  | 50  | 59  | 67  | 75  | 88    | 96  | 100    |            |
| Male                            | Healthy                        | education: low    | 197       | 25   | 38 | 50    | 59  | 67  | 75  | 78  | 88  | 96    | 100 | 100    |            |
|                                 |                                | education: middle | 493       | 25   | 30 | 46    | 55  | 67  | 71  | 75  | 84  | 96    | 100 | 100    |            |
|                                 |                                | education: high   | 365       | 30   | 38 | 50    | 63  | 71  | 75  | 80  | 88  | 96    | 100 | 100    |            |
|                                 | At least one chronic condition | education: low    | 280       | 0    | 13 | 30    | 42  | 50  | 55  | 63  | 71  | 84    | 100 | 100    |            |
|                                 |                                | education: middle | 482       | 0    | 9  | 25    | 42  | 50  | 55  | 63  | 75  | 84    | 100 | 100    |            |
|                                 |                                | education: high   | 317       | 5    | 13 | 34    | 46  | 50  | 59  | 67  | 75  | 88    | 100 | 100    |            |
|                                 |                                | Total             | 4403      | 9    | 17 | 38    | 50  | 59  | 67  | 75  | 80  | 92    | 100 | 100    |            |

Note. HRQoL: health-related quality of life; 50% percentiles represent 50% of the distribution corresponding to the median (Md); SD: standard deviation; values from -1 standard deviation (16%) to +1 standard deviation (85%) are within the normal range (i.e., not impaired HRQoL); values below 16% indicate impaired HRQoL and values above 85% indicate outstanding HRQoL.

| Sex x Health status x Age       |                                |                   | Low HRQoL |      |    | -1 SD |     | Md  |     |     | +1 SD |     | High HRQoL |        |
|---------------------------------|--------------------------------|-------------------|-----------|------|----|-------|-----|-----|-----|-----|-------|-----|------------|--------|
| Sex                             | Health status                  | Age               | N         | 2.5% | 5% | 16%   | 30% | 40% | 50% | 60% | 70%   | 85% | 95%        | 97.25% |
| Female                          | Healthy                        | Age: 18-40        | 434       | 16   | 20 | 31    | 45  | 50  | 56  | 60  | 70    | 86  | 100        | 100    |
|                                 |                                | Age: 41-64        | 408       | 25   | 31 | 50    | 65  | 75  | 80  | 86  | 95    | 100 | 100        | 100    |
|                                 |                                | Age: 65-75        | 119       | 35   | 49 | 60    | 80  | 86  | 90  | 95  | 100   | 100 | 100        | 100    |
|                                 | At least one chronic condition | Age: 18-40        | 547       | 0    | 5  | 20    | 31  | 35  | 40  | 50  | 56    | 70  | 80         | 87     |
|                                 |                                | Age: 41-64        | 587       | 9    | 16 | 31    | 40  | 50  | 56  | 65  | 75    | 86  | 100        | 100    |
|                                 |                                | Age: 65-75        | 174       | 17   | 25 | 50    | 60  | 70  | 80  | 86  | 90    | 100 | 100        | 100    |
| Male                            | Healthy                        | Age: 18-40        | 497       | 10   | 20 | 35    | 45  | 50  | 56  | 65  | 71    | 90  | 100        | 100    |
|                                 |                                | Age: 41-64        | 442       | 25   | 31 | 50    | 60  | 70  | 80  | 86  | 95    | 100 | 100        | 100    |
|                                 |                                | Age: 65-75        | 116       | 30   | 35 | 63    | 80  | 86  | 90  | 95  | 98    | 100 | 100        | 100    |
|                                 | At least one chronic condition | Age: 18-40        | 407       | 0    | 5  | 25    | 35  | 40  | 45  | 50  | 56    | 70  | 86         | 95     |
|                                 |                                | Age: 41-64        | 517       | 0    | 10 | 31    | 45  | 50  | 60  | 65  | 75    | 90  | 100        | 100    |
|                                 |                                | Age: 65-75        | 155       | 20   | 29 | 49    | 61  | 70  | 80  | 90  | 95    | 100 | 100        | 100    |
| Sex x Health status x Education |                                |                   | Low HRQoL |      |    | -1 SD |     | Md  |     |     | +1 SD |     | High HRQoL |        |
| Sex                             | Health status                  | Education         | N         | 2.5% | 5% | 16%   | 30% | 40% | 50% | 60% | 70%   | 85% | 95%        | 97.25% |
| Female                          | Healthy                        | education: low    | 193       | 18   | 29 | 45    | 50  | 60  | 70  | 80  | 86    | 100 | 100        | 100    |
|                                 |                                | education: middle | 383       | 20   | 25 | 40    | 53  | 65  | 75  | 86  | 90    | 100 | 100        | 100    |
|                                 |                                | education: high   | 385       | 20   | 22 | 40    | 50  | 60  | 70  | 75  | 80    | 95  | 100        | 100    |
|                                 | At least one chronic condition | education: low    | 332       | 5    | 10 | 25    | 40  | 50  | 56  | 60  | 70    | 90  | 100        | 100    |
|                                 |                                | education: middle | 526       | 0    | 10 | 25    | 35  | 45  | 50  | 60  | 70    | 80  | 95         | 100    |
|                                 |                                | education: high   | 450       | 5    | 10 | 25    | 35  | 45  | 50  | 60  | 65    | 80  | 95         | 100    |
| Male                            | Healthy                        | education: low    | 197       | 20   | 25 | 40    | 50  | 60  | 70  | 80  | 90    | 100 | 100        | 100    |
|                                 |                                | education: middle | 493       | 20   | 25 | 40    | 50  | 60  | 70  | 75  | 86    | 100 | 100        | 100    |
|                                 |                                | education: high   | 365       | 16   | 25 | 40    | 50  | 60  | 70  | 80  | 90    | 100 | 100        | 100    |
|                                 | At least one chronic condition | education: low    | 280       | 0    | 10 | 29    | 40  | 50  | 56  | 65  | 72    | 91  | 100        | 100    |
|                                 |                                | education: middle | 482       | 0    | 5  | 25    | 40  | 45  | 56  | 60  | 70    | 90  | 100        | 100    |
|                                 |                                | education: high   | 317       | 10   | 16 | 31    | 45  | 50  | 56  | 65  | 70    | 88  | 100        | 100    |
|                                 |                                | Total             | 4403      | 5    | 16 | 31    | 45  | 50  | 60  | 70  | 80    | 95  | 100        | 100    |

Note. HRQoL: health-related quality of life; 50% percentiles represent 50% of the distribution corresponding to the median (Md); SD: standard deviation; values from -1 standard deviation (16%) to +1 standard deviation (85%) are within the normal range (i.e., not impaired HRQoL); values below 16% indicate impaired HRQoL and values above 85% indicate outstanding HRQoL.

| Sex x Health status x Age       |                                |                   | Low HRQoL |      |    | -1 SD |     | Md  |     |     | +1 SD |     | High HRQoL |        |
|---------------------------------|--------------------------------|-------------------|-----------|------|----|-------|-----|-----|-----|-----|-------|-----|------------|--------|
| Sex                             | Health status                  | Age               | N         | 2.5% | 5% | 16%   | 30% | 40% | 50% | 60% | 70%   | 85% | 95%        | 97.25% |
| Female                          | Healthy                        | Age: 18-40        | 434       | 25   | 31 | 50    | 65  | 75  | 86  | 90  | 95    | 100 | 100        | 100    |
|                                 |                                | Age: 41-64        | 408       | 35   | 40 | 60    | 75  | 86  | 90  | 95  | 100   | 100 | 100        | 100    |
|                                 |                                | Age: 65-75        | 119       | 35   | 40 | 56    | 75  | 86  | 90  | 95  | 95    | 100 | 100        | 100    |
|                                 | At least one chronic condition | Age: 18-40        | 547       | 9    | 20 | 35    | 50  | 56  | 65  | 70  | 80    | 90  | 100        | 100    |
|                                 |                                | Age: 41-64        | 587       | 5    | 10 | 31    | 45  | 50  | 60  | 65  | 75    | 86  | 95         | 100    |
|                                 |                                | Age: 65-75        | 174       | 19   | 35 | 40    | 50  | 60  | 65  | 70  | 80    | 90  | 95         | 100    |
| Male                            | Healthy                        | Age: 18-40        | 497       | 22   | 31 | 45    | 50  | 65  | 75  | 86  | 95    | 100 | 100        | 100    |
|                                 |                                | Age: 41-64        | 442       | 35   | 40 | 56    | 75  | 80  | 86  | 93  | 100   | 100 | 100        | 100    |
|                                 |                                | Age: 65-75        | 116       | 35   | 49 | 75    | 86  | 86  | 90  | 95  | 98    | 100 | 100        | 100    |
|                                 | At least one chronic condition | Age: 18-40        | 407       | 11   | 20 | 35    | 45  | 50  | 56  | 60  | 70    | 86  | 95         | 100    |
|                                 |                                | Age: 41-64        | 517       | 5    | 16 | 35    | 49  | 50  | 60  | 70  | 75    | 90  | 100        | 100    |
|                                 |                                | Age: 65-75        | 155       | 16   | 20 | 40    | 50  | 59  | 70  | 75  | 80    | 90  | 100        | 100    |
| Sex x Health status x Education |                                |                   | Low HRQoL |      |    | -1 SD |     | Md  |     |     | +1 SD |     | High HRQoL |        |
| Sex                             | Health status                  | Education         | N         | 2.5% | 5% | 16%   | 30% | 40% | 50% | 60% | 70%   | 85% | 95%        | 97.25% |
| Female                          | Healthy                        | education: low    | 193       | 31   | 35 | 50    | 60  | 75  | 80  | 90  | 95    | 100 | 100        | 100    |
|                                 |                                | education: middle | 383       | 31   | 40 | 56    | 75  | 80  | 90  | 95  | 95    | 100 | 100        | 100    |
|                                 |                                | education: high   | 385       | 25   | 35 | 50    | 75  | 80  | 90  | 90  | 95    | 100 | 100        | 100    |
|                                 | At least one chronic condition | education: low    | 332       | 2    | 13 | 35    | 45  | 50  | 60  | 65  | 75    | 86  | 100        | 100    |
|                                 |                                | education: middle | 526       | 1    | 10 | 35    | 50  | 50  | 60  | 70  | 75    | 86  | 95         | 100    |
|                                 |                                | education: high   | 450       | 16   | 25 | 40    | 50  | 60  | 65  | 70  | 80    | 90  | 100        | 100    |
| Male                            | Healthy                        | education: low    | 197       | 25   | 31 | 50    | 60  | 75  | 86  | 90  | 96    | 100 | 100        | 100    |
|                                 |                                | education: middle | 493       | 25   | 35 | 50    | 65  | 75  | 86  | 90  | 95    | 100 | 100        | 100    |
|                                 |                                | education: high   | 365       | 31   | 35 | 50    | 65  | 75  | 86  | 90  | 95    | 100 | 100        | 100    |
|                                 | At least one chronic condition | education: low    | 280       | 10   | 16 | 35    | 45  | 50  | 56  | 65  | 70    | 86  | 96         | 100    |
|                                 |                                | education: middle | 482       | 10   | 20 | 35    | 45  | 56  | 60  | 70  | 75    | 90  | 100        | 100    |
|                                 |                                | education: high   | 317       | 15   | 25 | 40    | 50  | 50  | 60  | 70  | 80    | 90  | 100        | 100    |
|                                 |                                | Total             | 4403      | 16   | 25 | 40    | 50  | 60  | 70  | 80  | 90    | 100 | 100        | 100    |

Note. HRQoL: health-related quality of life; 50% percentiles represent 50% of the distribution corresponding to the median (Md); SD: standard deviation; values from -1 standard deviation (16%) to +1 standard deviation (85%) are within the normal range (i.e., not impaired HRQoL); values below 16% indicate impaired HRQoL and values above 85% indicate outstanding HRQoL.
